# Supplementary material for: Systemic and cerebrospinal fluid immune and complement activation in Ugandan children and adolescents with long‐standing nodding syndrome: A case‐control study
Source: PubMed Central journal article supplement (PMC8166803; doi:10.1002/epi4.12463), 2021-03-12
Supplement: EPI4-6-297-s001.pdf [file EPI4-6-297-s001.pdf]

## Supplementary

**Figure S1:** Correlation matrix between inflammatory marker levels and clinical factors among children with nodding syndrome

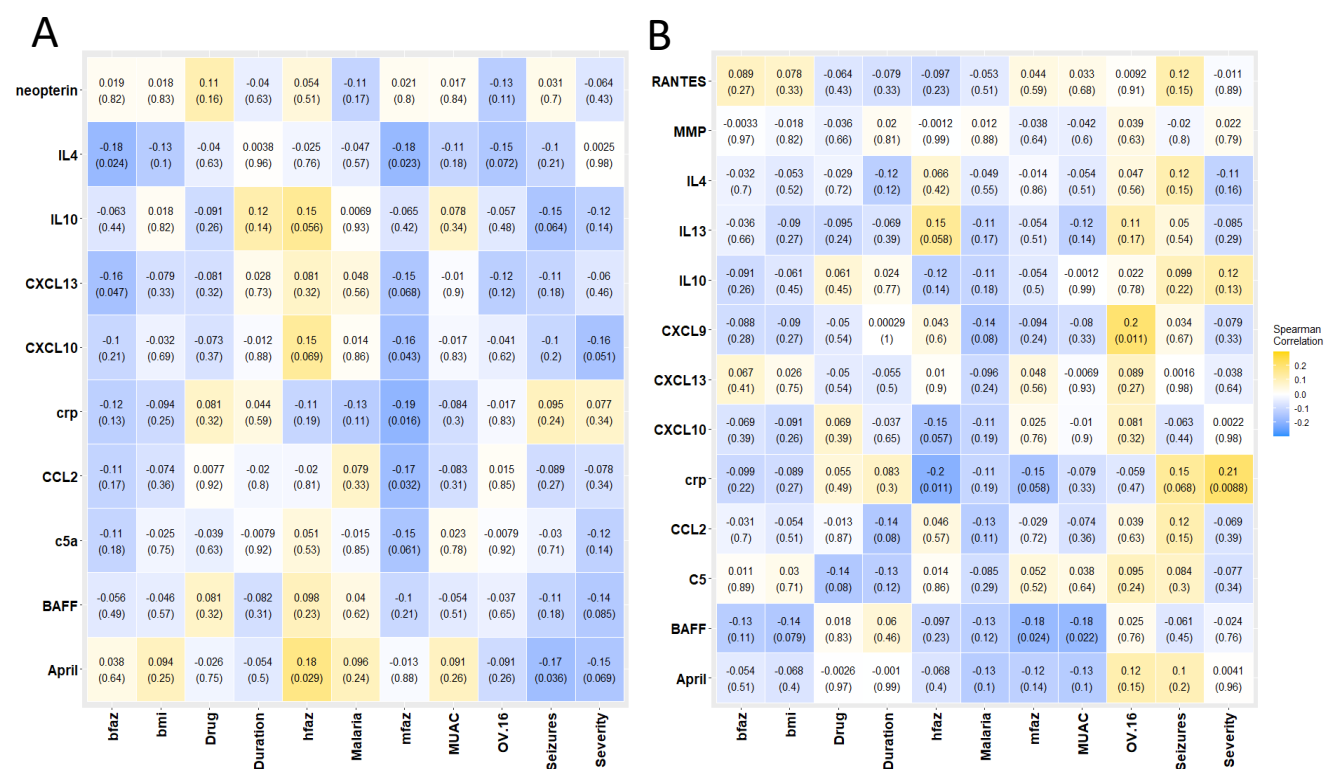

### Correlation matrix between biomarker levels in CSF (A), plasma (B) and clinical factors.

Matrices show the inflammatory biomarker level on the y-axis and selected clinical factors on the x-axis with the Spearman rho values and corresponding p-values (rho (p -value)) in each box. The matrices are coloured based on direction of correlation: gold is a positive correlation, while blue is a negative correlation. The clinical factors evaluated were: malaria (positive by blood smear), duration (number of years with disease), seizures (number of seizures in the last month), drug (dose in mg/kg/day of sodium valproate), bmi (body mass index), bfaz (bmi-for-age z score), hfaz (height-for-age z score), MUAC (mid upper arm circumference), mfaz (mid upper arm circumference for age z score), disease severity (disease stage mild, moderate, severe disease)

**Figure S2:** Correlation matrix between plasma and CSF marker levels cytokine among nodding syndrome participants.

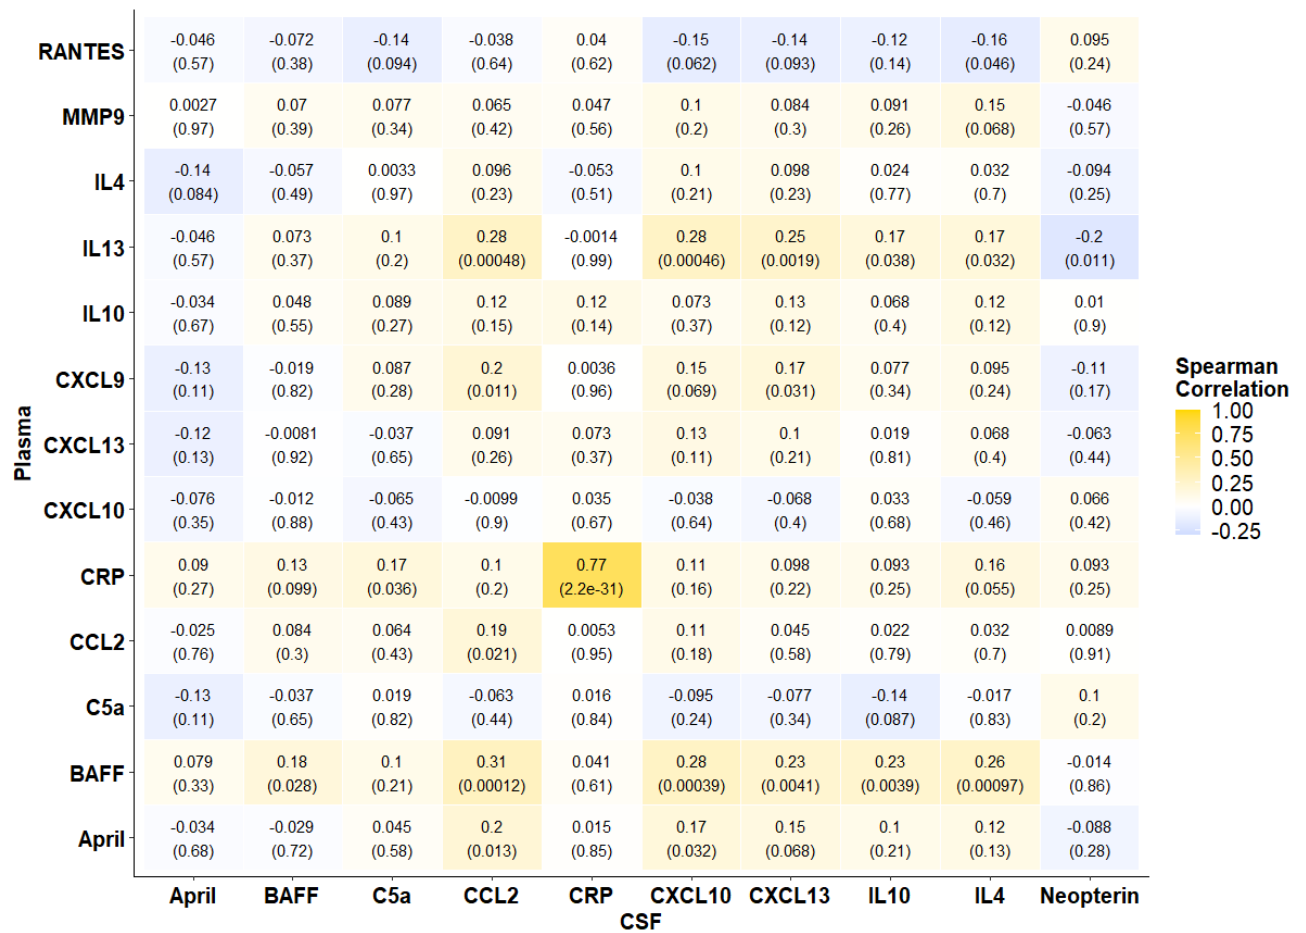

**Correlation matrix between biomarker levels in CSF and plasma.** Matrices show the plasma biomarker level on the y-axis and the CSF biomarkers on the x-axis with the Spearman rho values and corresponding p-values (rho (p -value)) in each box. The matrices are coloured based on direction of correlation: gold is a positive correlation, while blue is a negative correlation.

**Table S1.** Characteristics of children with nodding syndrome based on severity of illness

| <b>Variable</b>                              | <b>Mild disease<br/>(n=31)</b> | <b>Moderate disease<br/>(n=34)</b> | <b>Severe disease<br/>(n=89)</b> | <b>P trend</b> |
|----------------------------------------------|--------------------------------|------------------------------------|----------------------------------|----------------|
| <b>Demographics</b>                          |                                |                                    |                                  |                |
| Age, years, median (IQR)                     | 16 (15, 17)                    | 15 (15, 16)                        | 16 (15, 17)                      | 0.59           |
| Male, % (n/N)                                | 64.5% (20/31)                  | 50.0% (17/34)                      | 53.9% (48/89)                    | 0.62           |
| Height for age z score                       | -0.8 (-2.0, -0.2)              | -0.8 (-1.4, -0.2)                  | -1.3 (-1.9, -0.5)                | 0.059          |
| Severe stunting, % (n/N) (z score<-3)        | 3.2% (1/31)                    | 0.0% (0/34)                        | 8.9% (8/89)                      | 0.12           |
| BMI for age z score                          | -1.9 (-2.3, -1.0)              | -1.4 (-2.4, -1.0)                  | -1.9 (-3.4, -1.1)                | 0.14           |
| Severe wasted, % (n/N) (z score<-3)          | 9.6% (3/31)                    | 14.7% (5/34)                       | 30.3% (27/89)                    | 0.009          |
| MUAC, cm, median (IQR)                       | 23.2 (21.2, 25.0)              | 22.6 (21.2, 24.8)                  | 21.2 (19.0, 23.5)                | 0.006          |
| <b>History of Illness</b>                    |                                |                                    |                                  |                |
| Duration of illness, years                   | 8 (5, 9)                       | 9 (6, 10)                          | 9 (7, 10)                        | 0.01           |
| Ongoing seizures, % (n/N)                    | 0.0% (0/31)                    | 79.4% (27/34)                      | 73.0% (65/89)                    | <0.0001        |
| Seizure burden, median (IQR)                 | 2.0 (0, 4)                     | 0.0 (0, 4)                         | 2.0 (0, 4)                       | 0.43           |
| Dose sodium valproate, mg/kg                 | 20.4 (16.8, 24.5)              | 20.4 (17.0, 24.4)                  | 24.4 (19.7, 28.6)                | 0.01           |
| <b>Infection Status</b>                      |                                |                                    |                                  |                |
| Malaria positive, % (n/N)                    | 75.0% (24/31)                  | 69.7% (23/34)                      | 73.0% (65/89)                    | 0.88           |
| HIV infection, % (n/N)                       | 0.0% (0/31)                    | 3.0% (1/34)                        | 0.0% (0/89)                      | 0.42           |
| Seropositive OV16 % (n/N)                    | 90.0% (28/31)                  | 97.0% (33/34)                      | 95.5% (85/89)                    | 0.18           |
| Active <i>O. volvulus</i> infection, % (n/N) | 0.0% (0/31)                    | 0.0% (0/34)                        | 14.6% (13/89)                    | 0.003          |

**Table S2.** Comparing markers of immune activation in CSF of children with nodding syndrome and controls

|                              | <b>Nodding syndrome cases<br/>N=154</b> | <b>CSF controls<br/>N=15</b> | <b>OR (95% CI)</b>         | <b>P value</b> |
|------------------------------|-----------------------------------------|------------------------------|----------------------------|----------------|
| <b>Immune activation</b>     |                                         |                              |                            |                |
| CXCL10, pg/ml                | 94.04 (63.08, 173.1)                    | 82.46 (59.52, 193.30)        | 0.74 (0.12, 4.30)          | 0.74           |
| CCL2, pg/ml                  | 245.1 (171.9, 400.3)                    | 380.6 (223.6, 585.9)         | <b>0.04 (0.004, 0.443)</b> | 0.008          |
| CXCL13, pg/ml                | 18.96 (12.53, 22.64)                    | 17.69 (15.13, 21.53)         | 1.96 (0.02, 179.41)        | 0.77           |
| CXCL9, pg/ml                 | ND                                      | ND                           | -                          | -              |
| CCL5 (RANTES) ng/ml          | ND                                      | ND                           | -                          | -              |
| IL10, pg/ml                  | 10.86 (07.53, 12.6)                     | 10.67 (07.63, 14.78)         | 0.33 (0.03, 3.41)          | 0.35           |
| IL4, pg/ml                   | 29.17 (24.59, 38.19)                    | 31.0 (25.90, 42.21)          | 0.03 (0.00, 1.39)          | 0.07           |
| IL13, pg/ml                  | ND                                      | ND                           | -                          | -              |
| APRIL, pg/ml                 | 40.21 (26.44, 54.78)                    | 37.50 (26.43, 57.19)         | 0.38 (0.02, 9.89)          | 0.57           |
| BAFF, pg/ml                  | 66.48 (49.72, 88.78)                    | 87.51 (59.11, 143.4)         | <b>0.97 (0.96, 0.98)</b>   | 0.001          |
| MMP-9, ng/ml                 | ND                                      | ND                           | -                          | -              |
| Neopterin, mmol/L            | 2.39 (1.35, 3.57)                       | 3.75 (0.76, 9.11)            | 0.36 (0.10, 1.25)          | 0.10           |
| <b>Complement activation</b> |                                         |                              |                            |                |
| C5/C5a, ng/ml                | 11.82 (7.518, 16.53)                    | 0.49 (0.31, 0.551)           | #                          | ≤0.0001        |
| CRP, mg/ml                   | 2.52 (1.06, 4.00)                       | 4.00 (0.90, 4.00)            | 1.44(0.38, 5.32)           | 0.58           |

Data presented as median (IQR)

Odds ratio (OR) and 95% confidence interval (CI) calculated using logistic regression where expressed for a one-unit increase in log<sub>10</sub> transformed biomarker levels

Abbreviations: CXCL10 – C-X-C motif chemokine 10/ Interferon gamma-induced protein 10, CCL2 – chemokine (C-C motif) ligand 2, CXCL13 – chemokine (C-X-C motif) ligand 13, CXCL9 – Chemokine (C-X-C motif) ligand 9, CCL5(RANTES) – Chemokine (C-C motif) Ligand 5 (regulated on activation, normal T cell expressed and secreted), IL10 – Interleukin 10, IL4 – Interleukin 4, IL13 – Interleukin 13, April – A proliferation-inducing ligand, BAFF – B lymphocyte stimulator, MMP-9 – Matrix metalloproteinase 9, CRP – C -reactive protein, C5/C5a – Complement component, CSF – Cerebral spinal fluid , ND – Not detected , # Logistic estimate logC5a > 3.02 predicts data perfectly.

**Table S3.** Table of showing the frequency of children with nodding syndrome with elevated markers of CSF immune activation.

| Marker            | 5th centile<br>(lower limit CSF controls) | 95th centile<br>(upper limit CSF controls) | Number (%) of nodding<br>syndrome cases with elevated<br>marker levels |
|-------------------|-------------------------------------------|--------------------------------------------|------------------------------------------------------------------------|
| CXCL10, pg/ml     | 5.41                                      | 510                                        | 3 (0%)                                                                 |
| CCL2, pg/ml       | 10.62                                     | 704                                        | 3 (1.94%)                                                              |
| CXCL13, pg/ml     | 4.65                                      | 30.61                                      | 5 (4.54%)                                                              |
| IL4, pg/ml        | 7.69                                      | 62.38                                      | 1 (0.64%)                                                              |
| IL10, pg/ml       | 1.21                                      | 34.26                                      | 1 (0.64%)                                                              |
| APRIL, pg/ml      | 26.43                                     | 103.4                                      | 1 (1.29%)                                                              |
| BAFF, pg/ml       | 22.75                                     | 592.3                                      | 0 (0%)                                                                 |
| CRP, mg/L         | 0.00006                                   | 0.004                                      | 56 (36.3%)                                                             |
| C5/C5a, ng/ml     | 0.280                                     | 1.04                                       | 154 (100.0%)                                                           |
| Neopterin, nmol/L | 0.44                                      | 31.4                                       | 0 (0%)                                                                 |

The 5<sup>th</sup> and 95th centile represent the biomarker cut-offs based on the healthy Ugandan CSF controls. Abbreviations: CXCL10 – C-X-C motif chemokine 10/ Interferon gamma-induced protein 10, CCL2 – chemokine (C-C motif) ligand 2, CXCL13 – chemokine (C-X-C motif) ligand 13, IL4 – Interleukin 4, IL10 – Interleukin 10, April – A proliferation-inducing ligand, BAFF – B lymphocyte stimulator, CRP – C-reactive protein, C5/C5a – Complement component 5a.

**Table S4.** Differences in immune activation based on *O. volvulus* infection

| Markers                      | Nodding Syndrome        |                         |                       |         | Community Children      |                         |                     |         |
|------------------------------|-------------------------|-------------------------|-----------------------|---------|-------------------------|-------------------------|---------------------|---------|
|                              | Positive<br>N=147       | Negative<br>N=7         | OR (95% CI)           | P value | Positive<br>N=86        | Negative<br>N=68        | OR (95% CI)         | P value |
| <b>Immune activation</b>     |                         |                         |                       |         |                         |                         |                     |         |
| CXCL10, pg/ml                | 70.15 (46.77, 102.24)   | 49.54 (33.7, 76.14)     | 6.96 (0.35, 135.23)   | 0.17    | 73.05 (50.46, 101.65)   | 87.87 (56.19, 115.47)   | 0.34 (0.10, 1.17)   | 0.13    |
| CCL2, pg/ml                  | 35.85 (21.24, 66.49)    | 29.97 (21.24, 110.83)   | 0.94 (0.06, 14.60)    | 0.90    | 71.19 (53.79, 112.22)   | 68.71 (51.99, 111.65)   | 2.77 (0.577, 13.30) | 0.19    |
| CXCL13, pg/ml                | 40.88 (25.29, 71.05)    | 23.98 (17.87, 46.1)     | 12.35 (0.74, 206.50)  | 0.10    | 66.25 (45.11, 91.29)    | 68.56 (49.85, 85.88)    | 1.56 (0.43, 5.59)   | 0.90    |
| CXCL9, pg/ml                 | 399.7 (399.70, 703.94)  | 399.7 (399.70, 403.70)  | 87.12 (0.04, 1887.44) | 0.36    | 560.18 (399.70, 689.88) | 412.61 (399.70, 593.67) | 2.39 (0.30, 18.75)  | 0.24    |
| CCL5 (RANTES) ng/ml          | 2.17 (1.78, 2.74)       | 2.35 (1.72, 2.62)       | 0.42 (0.0015, 114.4)  | 0.83    | 2.95 (2.05, 3.38)       | 2.87 (2.30, 3.39)       | 0.82 (0.18, 3.73)   | 0.57    |
| IL10, pg/ml                  | 2.42 (2.42, 8.04)       | 2.42 (2.42, 3.12)       | 21.16 (0.13, 3424)    | 0.25    | 9.68 (2.82, 25.51)      | 14.23 (6.02, 32.76)     | 0.73 (0.45, 1.16)   | 0.11    |
| IL4, pg/ml                   | 38.18 (29.80, 56.33)    | 29.80 (20.79, 56.33)    | 8.89 (0.35, 225.29)   | 0.30    | 35.66 (28.78, 53.82)    | 41.12 (28.78, 53.16)    | 1.32 (0.22, 7.64)   | 0.82    |
| IL13, pg/ml                  | 245.18 (245.18, 554.15) | 245.18 (245.18, 357.02) | 13.59 (0.06, 2939.77) | 0.81    | 336.22 (245.18, 423.82) | 246.64 (245.18, 347.36) | 5.42 (0.55, 53.63)  | 0.12    |
| APRIL, pg/ml                 | 163.27 (97.65, 246.24)  | 142.98 (67.74, 287.89)  | 2.19 (0.12, 39.08)    | 0.80    | 235.39 (175.31, 311.22) | 239.70 (165.4, 333.61)  | 0.92 (0.19, 4.39)   | 0.78    |
| BAFF, pg/ml                  | 647.47 (567.31, 780.41) | 589.44 (451.86, 951.64) | 10.52(0.009, 11565)   | 0.59    | 642.90 (527.56, 766.84) | 686.20 (542.19, 860.28) | 0.13 (0.009, 2.03)  | 0.16    |
| MMP-9, ng/ml                 | 1.05 (0.70, 1.49)       | 1.23 (0.63, 1.41)       | 1.15 (0.08, 16.35)    | 0.99    | 1.85 (1.17, 3.21)       | 1.76 (1.20, 2.82)       | 1.60 (0.67, 3.80)   | 0.52    |
| <b>Complement activation</b> |                         |                         |                       |         |                         |                         |                     |         |
| C5/C5a, ng/ml                | 18.26 (12.04, 30.44)    | 18.62 (7.60, 23.44)     | 1.87 (0.2, 17.02)     | 0.58    | 21.09 (14.86, 27.78)    | 19.81 (15.44, 29.44)    | 0.78 (0.23, 2.61)   | 0.92    |
| CRP, mg/ml                   | 6.33 (2.49, 16.70)      | 14.25 (1.41, 64.02)     | 0.64 (0.18, 2.28)     | 0.36    | 4.14 (1.42, 10.52)      | 4.49 (1.51, 19.06)      | 0.82 (0.49, 1.37)   | 0.19    |

Data presented as median (IQR)

Plasma odds ratio (OR) and 95% confidence interval (CI) calculated using logistic regression adjusting for age and sex where OR expressed for a one-unit increase in log<sub>10</sub> transformed biomarker levels

Abbreviations: CXCL10 – C-X-C motif chemokine 10/ Interferon gamma-induced protein 10, CCL2 – chemokine (C-C motif) ligand 2, CXCL13 – chemokine (C-X-C motif) ligand 13, CXCL9 – Chemokine (C-X-C motif) ligand 9, CCL5(RANTES) – Chemokine (C-C motif) Ligand 5 (regulated on activation, normal T cell expressed and secreted), IL10 – Interleukin 10, IL4 – Interleukin 4, IL13 – Interleukin 13, APRIL – A proliferation-inducing ligand, BAFF – B lymphocyte stimulator, MMP-9 – Matrix metalloproteinase 9, CRP – C -reactive protein, C5/C5a – Complement component.

**Table S5.** Differences in immune activation in plasma based on nutritional status

|                           | Stunted              | Not stunted          |         | Wasted               | Not wasted           |         |
|---------------------------|----------------------|----------------------|---------|----------------------|----------------------|---------|
| <b>Nodding Syndrome</b>   |                      |                      |         |                      |                      |         |
| Markers                   | N= 9                 | N=145                | P value | N=35                 | N=119                | P value |
| CXCL10, pg/ml             | 90.9 (60.9, 141)     | 67.5 (46.7, 99.8)    | 0.25    | 76.1 (48.7, 127.4)   | 67.5 (45.4, 99.8)    | 0.20    |
| CCL2, pg/ml               | 27.9 (23.7, 72.6)    | 35.9 (21.2, 66.5)    | 0.86    | 30.0 (21.2, 63.8)    | 36.8 (21.2, 68.3)    | 0.60    |
| CXCL13, pg/ml             | 49.7 (29.5, 114.3)   | 36.1 (25.1, 67.2)    | 0.29    | 33.5 (20.9, 62.1)    | 41.2 (25.3, 72.3)    | 0.16    |
| CXCL9, pg/ml              | 399.7 (399.7, 403.7) | 399.7 (399.7, 655.2) | 0.63    | 399.7 (399.7, 655.2) | 399.7 (399.7, 850.1) | 0.40    |
| CCL5 (RANTES) ng/ml       | 2.50 (1.62, 2.81)    | 2.18 (1.81, 2.72)    | 0.68    | 1.82 (1.40, 2.64)    | 2.24 (1.94, 2.80)    | 0.01    |
| IL10, pg/ml               | 2.42 (2.42, 12.09)   | 2.42 (2.42, 7.64)    | 0.95    | 5.04 (2.42, 15.25)   | 2.42 (2.42, 5.35)    | 0.007   |
| IL4, pg/ml                | 29.8 (20.8, 70.9)    | 38.2 (29.8, 56.3)    | 0.73    | 38.2 (20.8, 56.3)    | 38.2 (29.8, 61.2)    | 0.81    |
| IL13, pg/ml               | 245.2 (245.2, 333.6) | 245.2 (245.2, 481.0) | 0.64    | 245.2 (245.2, 333.6) | 245.2 (245.2, 554.2) | 0.44    |
| APRIL, pg/ml              | 120.0 (116.7, 287.9) | 163.3 (93.6, 246.2)  | 0.52    | 163.3 (91.5, 237.6)  | 163.3 (94.0, 246.2)  | 0.78    |
| BAFF, pg/ml               | 646.1 (565.1, 810.8) | 647.5 (567.8, 780.4) | 0.73    | 688.7 (585.0, 825.2) | 643.8 (554.1, 780.4) | 0.38    |
| MMP-9, ng/ml              | 0.88 (0.70, 1.13)    | 1.10 (0.71, 1.51)    | 0.27    | 0.95 (0.70, 1.47)    | 1.11 (0.70, 1.51)    | 0.42    |
| C5/C5a, ng/ml             | 10.7 (8.2, 27.9)     | 18.6 (13.1, 29.7)    | 0.33    | 16.9 (10.6, 23.9)    | 18.8 (13.9, 30.5)    | 0.09    |
| CRP, mg/ml                | 8.43 (2.43, 11.48)   | 6.33 (2.51, 17.08)   | 0.96    | 9.06 (3.58, 50.55)   | 6.33 (2.42, 12.29)   | 0.11    |
| <b>Community Children</b> |                      |                      |         |                      |                      |         |
| Markers                   | N=6                  | N=148                | P value | N=17                 | N=137                | P value |
| CXCL10, pg/ml             | 78.38 (53.82, 104.6) | 75.13 (54.8, 110.1)  | 0.84    | 67.38 (55.82, 106.7) | 76.05 (54.15, 110.5) | 0.63    |
| CCL2, pg/ml               | 65.20 (52.78, 116.2) | 69.89 (53.78, 111.7) | 0.95    | 74.39 (58.87, 108.1) | 69.89 (51.99, 112.7) | 0.78    |
| CXCL13, pg/ml             | 75.68 (60.16, 104.9) | 66.9 (47.0, 87.5)    | 0.31    | 73.01 (50.18, 98.64) | 66.85 (48.34, 86.79) | 0.92    |
| CXCL9, pg/ml              | 503.1 (399.7, 689.9) | 412.6 (399.7, 689.9) | 0.65    | 560.2 (399.7, 689.9) | 412.6 (399.7, 689.9) | 0.86    |
| CCL5 (RANTES) ng/ml       | 3.18 (2.17, 3.71)    | 2.92 (2.14, 3.38)    | 0.45    | 3.07 (2.13, 3.52)    | 2.92 (2.22, 3.38)    | 0.50    |
| IL10, pg/ml               | 70.09 (3.06, 719.4)  | 11.96 (3.28, 24.70)  | 0.14    | 14.09 (4.27, 24.2)   | 11.96 (3.28, 26.2)   | 0.94    |
| IL4, pg/ml                | 44.77 (38.04, 53.33) | 38.39 (28.78, 53.16) | 0.42    | 44.77 (32.22, 53.16) | 41.12 (28.78, 53.16) | 0.57    |
| IL13, pg/ml               | 380.0 (245.2, 509.3) | 336.2 (245.2, 347.4) | 0.58    | 336.2 (245.2, 347.3) | 336.2 (245.2, 423.8) | 0.78    |
| APRIL, pg/ml              | 238.1 (230.9, 329.2) | 237.0 (169.6, 321.7) | 0.76    | 285.7 (212.4, 379.6) | 233.8 (173.9, 319.8) | 0.22    |
| BAFF, pg/ml               | 769.0 (678.2, 825.9) | 650.0 (531.8, 815.8) | 0.19    | 760.0 (652.8, 979.3) | 635.2 (521.7, 796.4) | 0.009   |
| MMP-9, ng/ml              | 1.67 (1.53, 4.55)    | 1.85 (1.16, 2.85)    | 0.54    | 2.23 (1.55, 2.56)    | 1.18 (1.17, 2.87)    | 0.73    |
| C5/C5a, ng/ml             | 29.95 (24.0, 45.2)   | 19.99 (15.15, 27.75) | 0.08    | 23.96 (18.48, 28.50) | 19.89 (15.00, 27.93) | 0.42    |
| CRP, mg/ml                | 4.87 (4.06, 12.89)   | 4.30 (1.40, 13.77)   | 0.33    | 4.67 (2.93, 17.58)   | 4.29 (1.38, 12.3)    | 0.24    |

Data presented as median (IQR) and analysed using a Mann Whitney U test

Abbreviations: CXCL10 – C-X-C motif chemokine 10/ Interferon gamma-induced protein 10, CCL2 – chemokine (C-C motif) ligand 2, CXCL13 – chemokine (C-X-C motif) ligand 13, CXCL9 – Chemokine (C-X-C motif) ligand 9, CCL5(RANTES) – Chemokine (C-C motif) Ligand 5 (regulated on activation, normal T cell expressed and secreted), IL10 – Interleukin 10, IL4 – Interleukin 4, IL13 – Interleukin 13, APRIL – A proliferation-inducing ligand, BAFF – B lymphocyte stimulator, MMP-9 – Matrix metalloproteinase 9, CRP – C -reactive protein, C5/C5a – Complement component, CSF – Cerebral spinal fluid, ND – Not detected
